# Supplementary material for: Synthesis and characterization of Co-NPAC and in situ hydroxyl radical generation for the oxidation of dye laden wastewater from the leather industry
Source: Royal Society of Chemistry journal article supplement (doi:10.1039/c4ra10536b), 2014-01-01
Supplement: c4ra10536b1.pdf [file c4ra10536b1.pdf]

**-Supporting information-**

**Synthesis characterization of Co-NPAC and insitu hydroxyl radical generation for  
oxidation of dye laden wastewater from leather industry**

**S.Karthikeyan<sup>a</sup>, R. Bavas Ahamed<sup>b</sup>, M. Velan<sup>b</sup>, G.Sekaran<sup>a\*</sup>**

*a. Environmental Technology Division, Council of Scientific and Industrial Research (CSIR) -  
Central Leather Research Institute (CLRI), Adyar, Chennai-600 020, Tamilnadu, India.*

*b. Chemical Engineering Department, Anna University, Guindy, Chennai 600 025 Tamil Nadu,  
India*

**\* Corresponding Author**

**Dr. G. Sekaran,**

Chief Scientist & Cluster chairman

Environmental Technology Division,

Central Leather Research Institute,

Adyar, Chennai – 600 020,

Tamil Nadu, India

Tel.: +91-44-24911386 (Extn: 7141)

Fax: +91-44-24452941

**Email: ganesansekar@gmail.com**

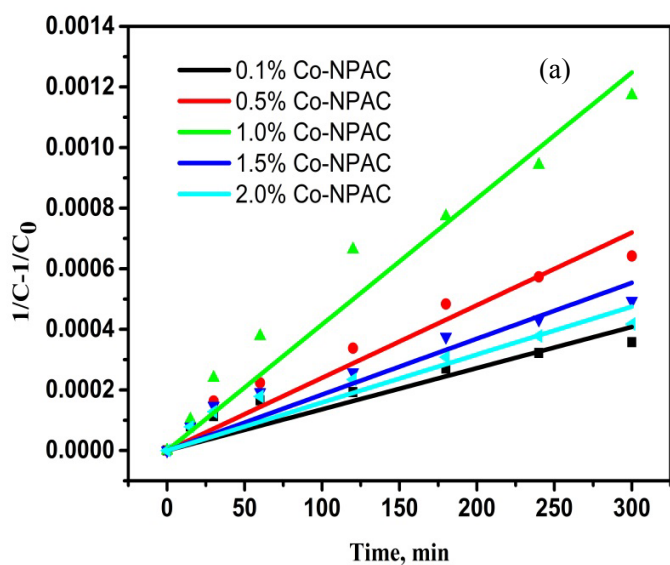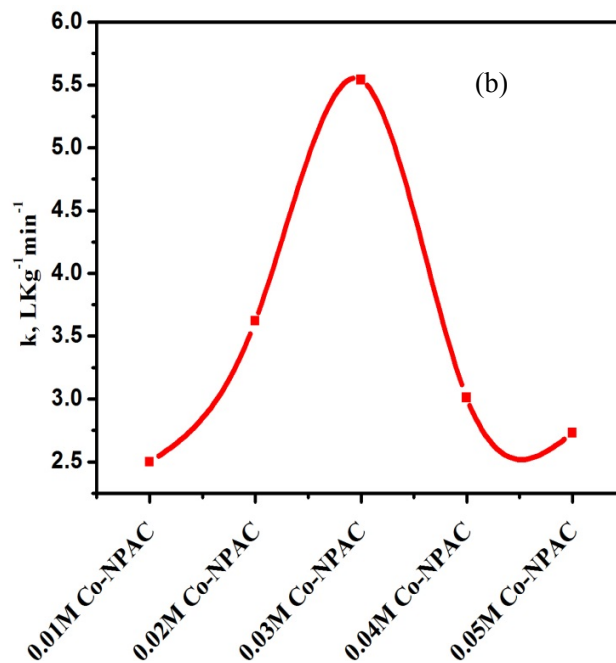

Fig. S1 Pseudo second order kinetics of heterogeneous oxidation process using different Co-NPAC concentration 0.1wt. %, 0.5wt. %, 1wt. %, 1.5 wt. % and 2wt.%Co-NPAC, a)  $1/C - 1/C_0$  Vs. time,  $t$  plot for all catalyst b) Reaction rate ( $K$ ) behavior for varying concentration

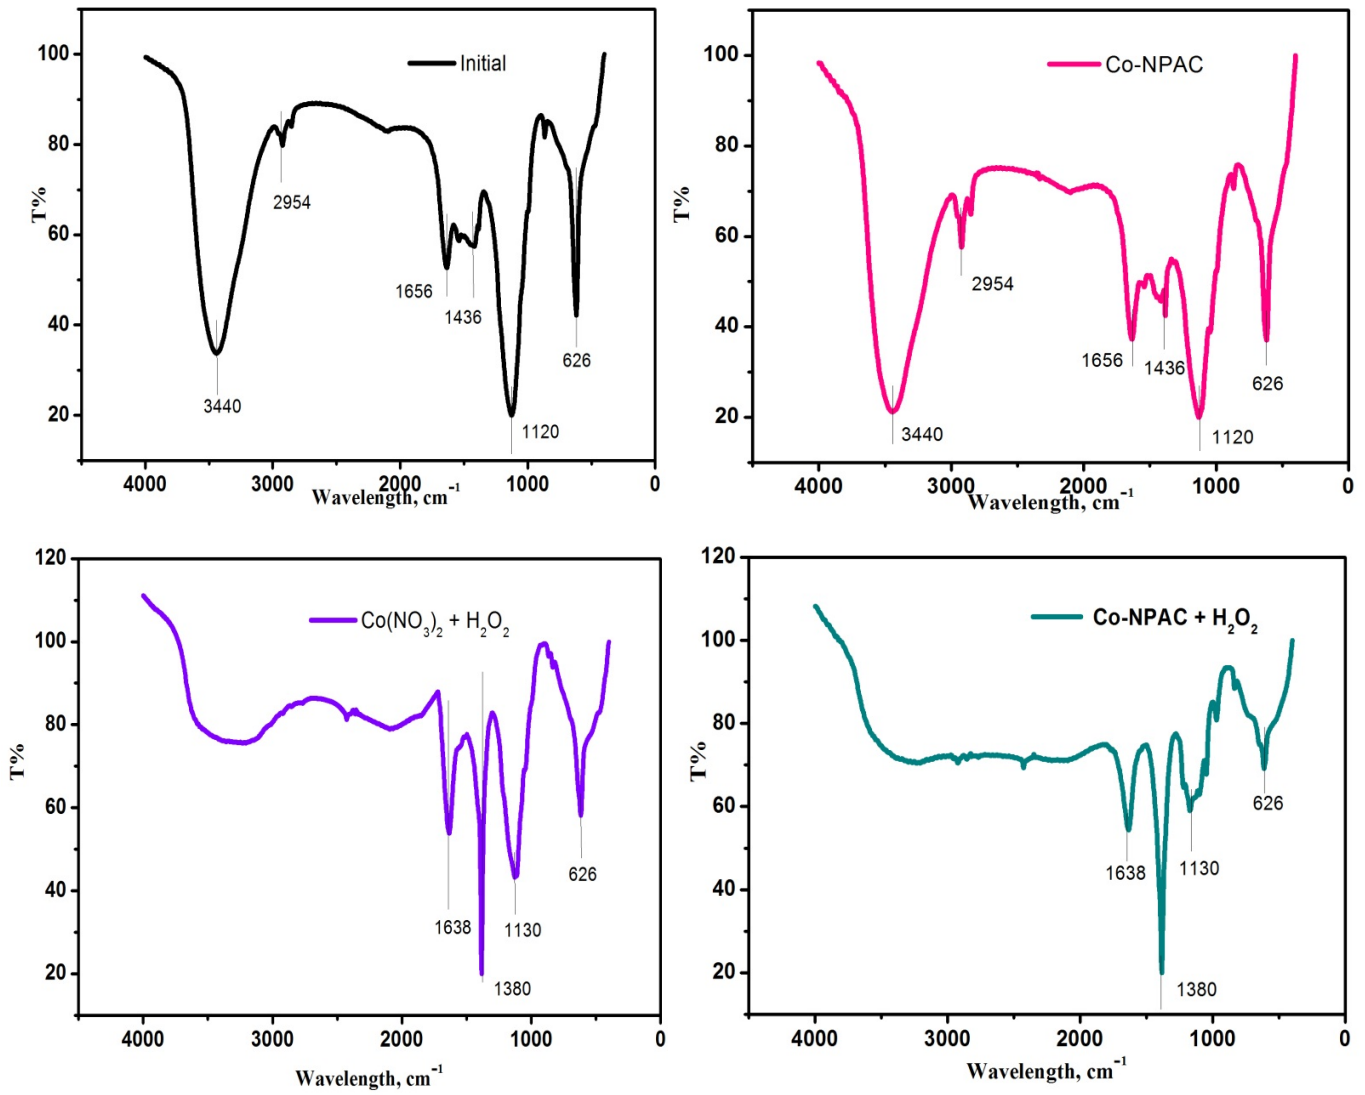

Fig.S2 FT-IR spectra of initial effluent, effluent after adsorption by Co-NPAC, effluent after heterogeneous Fenton process using Co-NPAC, and effluent after homogeneous Fenton oxidation process (clock wise)

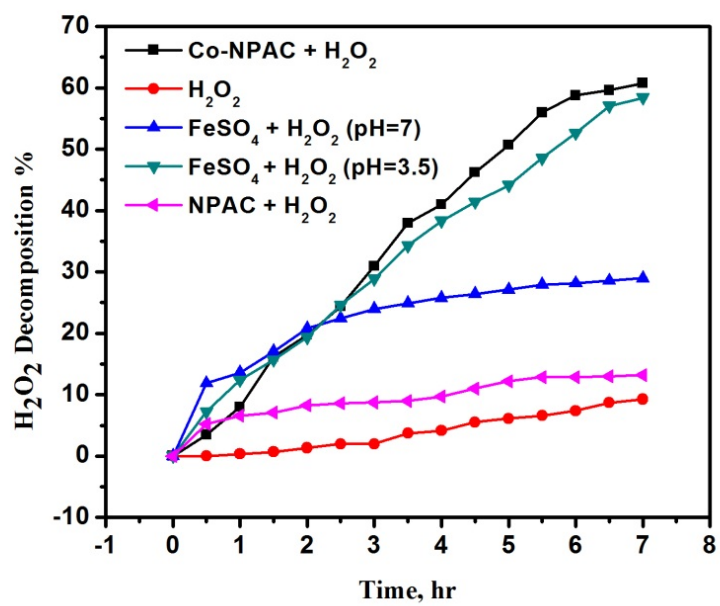

Fig. S3 Decomposition of hydrogen peroxide with different Fenton oxidation condition,

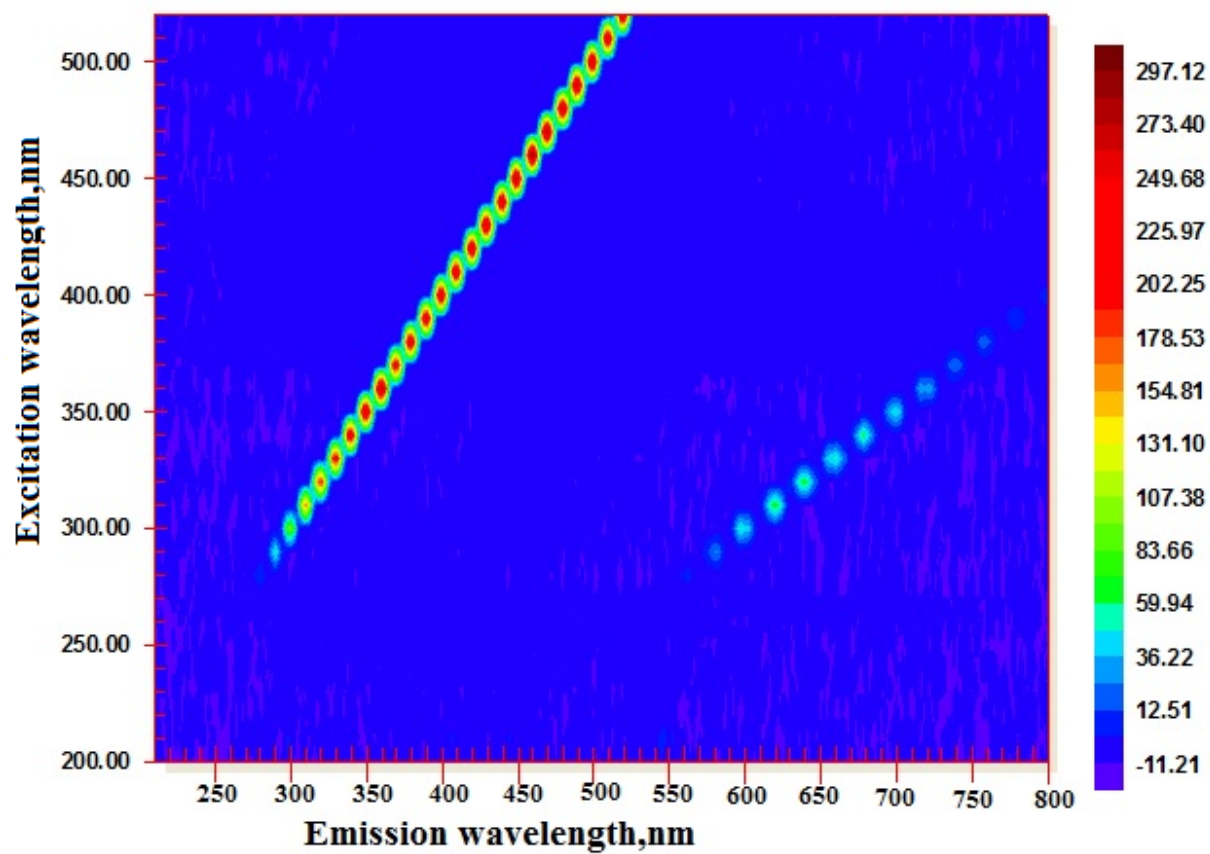

Fig.S4 EES spectrum of terephthalic acid  $\langle\lambda\rangle$ excitation and  $\langle\lambda\rangle$ emission 315nm and 425nm,

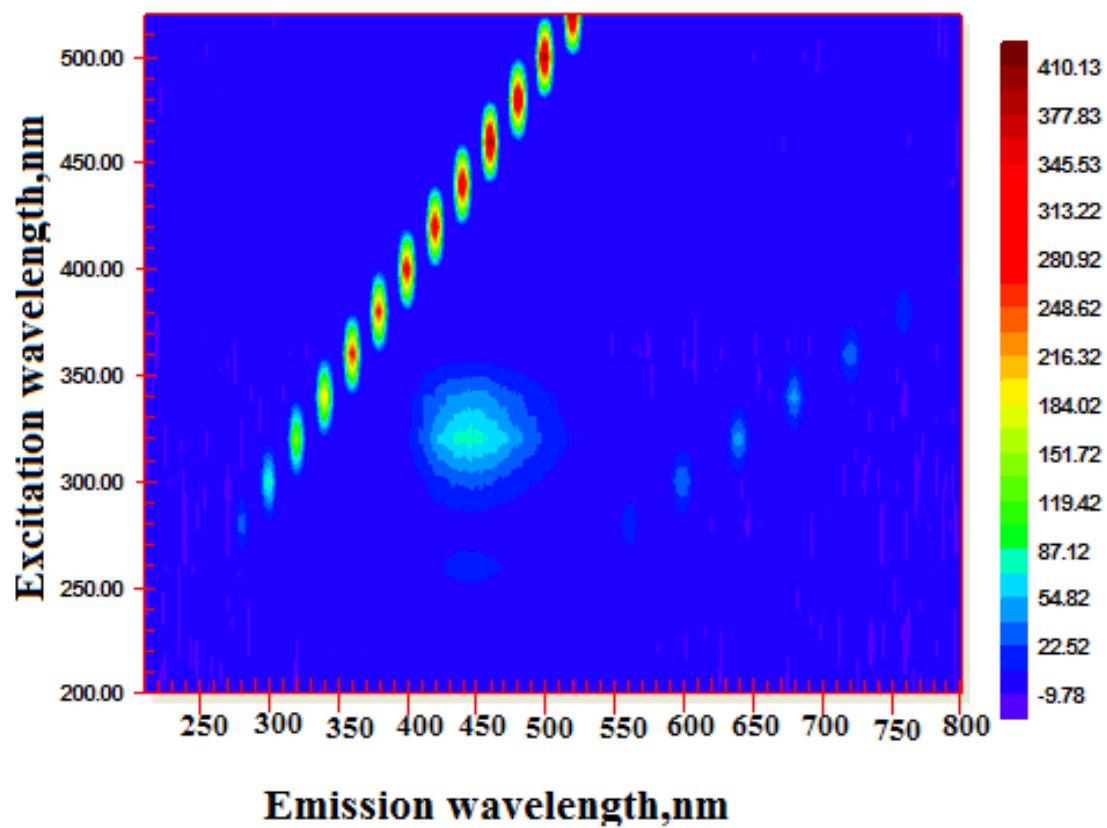

Fig.S5 2-hydroxy terephthalic acid using Co-NPAC/H<sub>2</sub>O<sub>2</sub> EES spectrum  $\lambda_{\text{excitation}}$ , 315nm;  $\lambda_{\text{emission}}$ , 425nm,

**Table S1** Pseudo second order kinetics corresponding k (rate of the reaction) and R<sup>2</sup> value of different Co-NPAC

| Sample         | K(L/kg/min) | R <sup>2</sup> |
|----------------|-------------|----------------|
| 0.1wt% Co-NPAC | 2.498       | 0.9489         |
| 0.5wt%Co-NPAC  | 3.621       | 0.9753         |
| 1.0wt%Co-NPAC  | 5.540       | 0.9807         |
| 1.5wt%Co-NPAC  | 3.010       | 0.9647         |
| 2.0wt%Co-NPAC  | 2.273       | 0.9574         |

**Table S2** Pseudo second order kinetics of k (reaction rate) and R<sup>2</sup> value of different H<sub>2</sub>O<sub>2</sub> concentrations.

| Sample                             | K(L/kg/min) | R <sup>2</sup> |
|------------------------------------|-------------|----------------|
| 2mM H <sub>2</sub> O <sub>2</sub>  | 2.404       | 0.9592         |
| 4mM H <sub>2</sub> O <sub>2</sub>  | 3.125       | 0.9401         |
| 6mM H <sub>2</sub> O <sub>2</sub>  | 3.518       | 0.9515         |
| 8mM H <sub>2</sub> O <sub>2</sub>  | 3.574       | 0.9633         |
| 10mM H <sub>2</sub> O <sub>2</sub> | 5.677       | 0.9822         |



**Table S3** Pseudo second order kinetics of heterogeneous Fenton process corresponding k  
(reaction rate) and R<sup>2</sup> value of different Ph

| Sample | K(L/kg/min) | R <sup>2</sup> |
|--------|-------------|----------------|
| pH3    | 4.055       | 0.9887         |
| pH4    | 3.811       | 0.9861         |
| pH5    | 3.497       | 0.9855         |
| pH6    | 3.223       | 0.9834         |
| pH7    | 2.683       | 0.9859         |
| pH8    | 2.163       | 0.9898         |
| pH9    | 2.194       | 0.9865         |
| pH10   | 2.219       | 0.9847         |

**Table S4** Pseudo second order kinetics of heterogeneous Fenton process corresponding k (reaction rate) and R<sup>2</sup> at temperature.

| Sample | K(L/kg/min) | R <sup>2</sup> |
|--------|-------------|----------------|
| 55 °C  | 6.412       | 0.9726         |
| 45 °C  | 4.955       | 0.9784         |
| 35 °C  | 4.910       | 0.9859         |
| 25 °C  | 4.802       | 0.9469         |
